# Supplementary material for: Evaluation of the abuse potential of difelikefalin, a selective kappa‐opioid receptor agonist, in recreational polydrug users
Source: PubMed Central journal article supplement — Clin Transl Sci. 2021 Oct 28;15(2):535–47. doi: 10.1111/cts.13173 (PMC8841457; doi:10.1111/cts.13173), 2021-10-28
Supplement: CTS-15-535-s001.pdf [file CTS-15-535-s001.pdf]

**Figure S2.** Treatment Differences in Hallucinogen Rating Scale Subscores for Pentazocine and Difelikefalin Treatment Relative to Placebo **(A)** and for Pentazocine Treatment Relative to Difelikefalin **(B)**

**A. Pentazocine and Difelikefalin vs. Placebo**

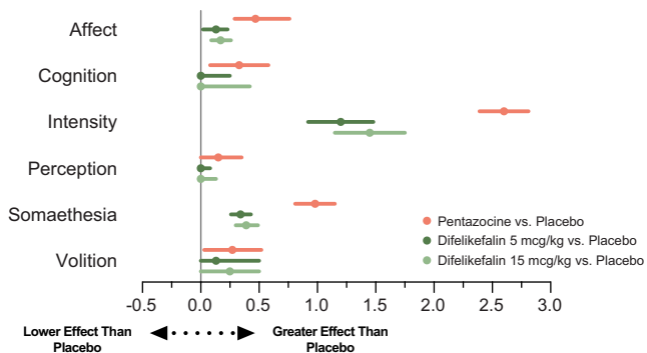

**B. Difelikefalin vs. Pentazocine**

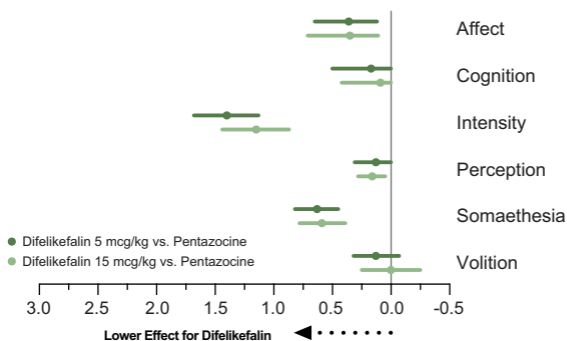

Data represent the central value of treatment differences with lower/upper limit for each subscore of the Hallucinogenic Rating Scale (completer set, N=39). Depending on the test statistic used to compare treatment groups, the central value represented in the plots is either the mean or the median and the limits are either the upper/lower value of the 95% CI around the mean or the 1st and 3rd quartile of the distribution. CI, confidence interval.
