# Supplementary material for: Evaluation of the abuse potential of difelikefalin, a selective kappa‐opioid receptor agonist, in recreational polydrug users
Source: PubMed Central journal article supplement — Clin Transl Sci. 2021 Oct 28;15(2):535–47. doi: 10.1111/cts.13173 (PMC8841457; doi:10.1111/cts.13173), 2021-10-28
Supplement: CTS-15-535-s002.pdf [file CTS-15-535-s002.pdf]

**Figure S3.** Median Drug Similarity VAS Scores at 8 Hours Postdose

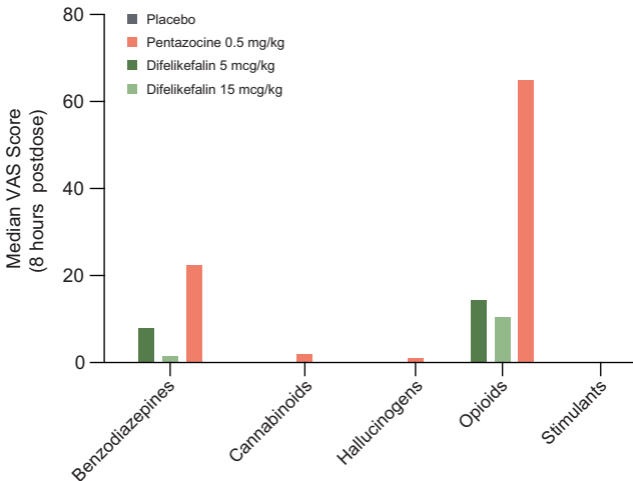

Participants were asked to complete a unipolar VAS scale (0 [not at all similar] to 100 [very similar]) for each drug class they had prior experience with. The number of respondents was benzodiazepines (n=8), cannabinoids (n=37), hallucinogens (n=38), opioids (n=38), and stimulants (n=18-19). VAS, visual analog scale.
